# Supplementary material for: Influence of specialization from intensive care physicians on outcome in multiply injured patients – a matched-pair analysis at a level I trauma center
Source: Research Square preprint supplement (doi:10.21203/rs.3.rs-4359061/v1), 2024-05-13
Supplement: Supplementary file 1 [file fff0ae85133042cba9bbcec0.docx]

**Data evaluation – ICU „Traumaregister“ (status 20.02.2024)**

Descriptive statistic – total study population (n=1.015)

| **Statistics** |
| --- |
|  | Age | ASA | AIS_head | AIS_face | AIS_thorax | AIS_abdomen | AIS_extremities | AIS_soft_tissue | ISS |
| N | Valid | 1015 | 1015 | 1015 | 1015 | 1015 | 1015 | 1015 | 1015 | 1015 |
| Missing | 0 | 0 | 0 | 0 | 0 | 0 | 0 | 0 | 0 |
| Mean value | 45,37 | 1,43 | 2,23 | ,82 | 2,71 | 1,16 | 2,21 | ,66 | 28,63 |  |
| Median | 44,00 | 1,00 | 3,00 | ,00 | 3,00 | ,00 | 3,00 | ,00 | 27,00 |  |
| Standard deviation | 19,684 | ,670 | 1,743 | 1,137 | 1,530 | 1,438 | 1,351 | ,863 | 10,208 |  |
| Variance | 387,474 | ,449 | 3,038 | 1,293 | 2,342 | 2,067 | 1,826 | ,744 | 104,195 |  |
| Minimum | 16 | 1 | 0 | 0 | 0 | 0 | 0 | 0 | 16 |  |
| Maximum | 93 | 3 | 6 | 5 | 5 | 5 | 5 | 5 | 75 |  |

| **Statistics** |
| --- |
|  | GCS_prehospitall | SBP (at admission) | HF (at admission) | Shock_index (at admission) | PRBC_48h | FFP_48h | TC_48h | PRBC_total | FFP_total | TC_total |
| N | Valid | 1015 | 1014 | 1014 | 1014 | 1015 | 1015 | 1015 | 1015 | 1015 | 1015 |
| Missing | 0 | 1 | 1 | 1 | 0 | 0 | 0 | 0 | 0 | 0 |
| Mean value | 10,27 | 119,41 | 90,20 | ,8189 | 5,69 | 4,21 | ,76 | 10,13 | 5,94 | 1,12 |  |
| Median | 13,00 | 120,00 | 89,00 | ,7333 | 2,00 | ,00 | ,00 | 4,00 | ,00 | ,00 |  |
| Standard deviation | 5,008 | 29,665 | 20,682 | ,38904 | 9,625 | 7,719 | 1,924 | 15,957 | 11,396 | 3,219 |  |
| Variance | 25,084 | 880,007 | 427,736 | ,151 | 92,632 | 59,581 | 3,702 | 254,641 | 129,873 | 10,359 |  |
| Minimum | 3 | 20 | 3 | ,05 | 0 | 0 | 0 | 0 | 0 | 0 |  |
| Maximum | 15 | 233 | 165 | 6,43 | 81 | 72 | 22 | 200 | 140 | 41 |  |

| **Statistics** |
| --- |
|  | Ventilation_hours | ICU_duration | Ward_duration | GOS |
| N | Valid | 1015 | 1015 | 1015 | 1015 |
| Missing | 0 | 0 | 0 | 0 |
| Mean value | 226,1542 | 13,0122 | 22,37 | 3,85 |  |
| Median | 83,0000 | 9,0000 | 17,00 | 4,00 |  |
| Standard deviation | 297,17482 | 13,20162 | 18,055 | 1,385 |  |
| Variance | 88312,873 | 174,283 | 325,990 | 1,918 |  |
| Minimum | ,00 | ,00 | 0 | 0 |  |
| Maximum | 1963,00 | 101,00 | 140 | 5 |  |

| **Statistics** |
| --- |
|  | BE (at admission) | pH (at admission) | Hb (at admission) | Lactate (at admission) | HCO3 (at admission) | PTT (at admission) |
| N | Valid | 1006 | 1012 | 1007 | 993 | 1010 | 1002 |
| Missing | 9 | 3 | 8 | 22 | 5 | 13 |
| Mean value | -2,3765 | 7,3582 | 12,0308 | 2,9421 | 22,700 | 32,9603 |  |
| Median | -1,9000 | 7,3300 | 12,1000 | 2,3500 | 23,000 | 28,0000 |  |
| Standard deviation | 4,70170 | 1,29733 | 3,60792 | 2,31138 | 4,1360 | 19,83229 |  |
| Variance | 22,106 | 1,683 | 13,017 | 5,342 | 17,106 | 393,320 |  |
| Minimum | -27,80 | -1,70 | 3,50 | ,40 | -24,0 | -23,00 |  |
| Maximum | 33,96 | 41,00 | 89,00 | 25,33 | 45,5 | 200,00 |  |

| **Sex** |
| --- |
|  | Incidence | Percent | Valid percentages | Cumulative percentages |
| Valid | female | 286 | 28,2 | 28,2 | 28,2 |
| male | 729 | 71,8 | 71,8 | 100,0 |
| total | 1015 | 100,0 | 100,0 |  |

| **ICU** |
| --- |
|  | Incidence | Percent | Valid percentages | Cumulative percentages |
| Valid | Anesthesiology | 95 | 9,4 | 9,4 | 9,4 |
| Trauma surgery | 920 | 90,6 | 90,6 | 100,0 |
| Total | 1015 | 100,0 | 100,0 |  |

| **Shock at admission** |
| --- |
|  | Incidence | Percent | Valid percentages | Cumulative percentages |
| Valid | No | 831 | 81,9 | 81,9 | 81,9 |
| Yes | 184 | 18,1 | 18,1 | 100,0 |
| Total | 1015 | 100,0 | 100,0 |  |

| **Mortality** |
| --- |
|  | Incidence | Percent | Valid percentages | Cumulative percentages |
| Valid | No | 899 | 88,6 | 88,6 | 88,6 |
| Yes | 116 | 11,4 | 11,4 | 100,0 |
| Total | 1015 | 100,0 | 100,0 |  |

Descriptive statistic – trauma surgery (n=920)

| **Statistics** |
| --- |
|  | Age | ASA | AIS_head | AIS_face | AIS_thorax | AIS_abdomen | AIS_extremities | AIS_soft_tissue | ISS |
| N | Valid | 920 | 920 | 920 | 920 | 920 | 920 | 920 | 920 | 920 |
| Missing | 0 | 0 | 0 | 0 | 0 | 0 | 0 | 0 | 0 |
| Mean value | 45,32 | 1,42 | 2,20 | ,83 | 2,73 | 1,17 | 2,25 | ,65 | 28,59 |  |
| Median | 44,00 | 1,00 | 2,00 | ,00 | 3,00 | ,00 | 3,00 | ,00 | 27,00 |  |
| Standard deviation | 19,439 | ,661 | 1,726 | 1,134 | 1,517 | 1,433 | 1,345 | ,864 | 10,271 |  |
| Variance | 377,892 | ,437 | 2,978 | 1,286 | 2,301 | 2,052 | 1,809 | ,747 | 105,499 |  |
| Minimum | 16 | 1 | 0 | 0 | 0 | 0 | 0 | 0 | 16 |  |
| Maximum | 93 | 3 | 6 | 5 | 5 | 5 | 5 | 5 | 75 |  |

| **Statistics** |
| --- |
|  | GCS_prehospitall | SBP (at admission) | HF (at admission) | Shock_index (at admission) | PRBC_48h | FFP_48h | TC_48h | PRBC_total | FFP_total | TC_total |
| N | Valid | 920 | 919 | 919 | 919 | 920 | 920 | 920 | 920 | 920 | 920 |
| Missing | 0 | 1 | 1 | 1 | 0 | 0 | 0 | 0 | 0 | 0 |
| Mean value | 10,32 | 118,67 | 90,55 | ,8283 | 5,85 | 4,31 | ,78 | 10,40 | 6,08 | 1,17 |  |
| Median | 13,00 | 120,00 | 90,00 | ,7372 | 2,00 | ,00 | ,00 | 5,00 | ,00 | ,00 |  |
| Standard deviation | 5,001 | 29,513 | 20,701 | ,39871 | 9,862 | 7,919 | 1,983 | 16,341 | 11,705 | 3,347 |  |
| Variance | 25,012 | 871,030 | 428,537 | ,159 | 97,264 | 62,704 | 3,932 | 267,032 | 137,015 | 11,199 |  |
| Minimum | 3 | 20 | 3 | ,05 | 0 | 0 | 0 | 0 | 0 | 0 |  |
| Maximum | 15 | 233 | 165 | 6,43 | 81 | 72 | 22 | 200 | 140 | 41 |  |

| **Statistics** |
| --- |
|  | Ventilation_hours | ICU_duration | Ward_duration | GOS |
| N | Valid | 920 | 920 | 920 | 920 |
| Missing | 0 | 0 | 0 | 0 |
| Mean value | 230,3005 | 13,1145 | 22,53 | 3,86 |  |
| Median | 91,0000 | 9,0000 | 18,00 | 4,00 |  |
| Standard deviation | 296,49902 | 13,09320 | 18,044 | 1,370 |  |
| Variance | 87911,670 | 171,432 | 325,590 | 1,876 |  |
| Minimum | ,00 | ,00 | 0 | 0 |  |
| Maximum | 1963,00 | 101,00 | 140 | 5 |  |

| **Statistics** |
| --- |
|  | BE (at admission) | pH (at admission) | Hb (at admission) | Lactate (at admission) | HCO3 (at admission) | PTT (at admission) |
| N | Valid | 913 | 919 | 913 | 902 | 917 | 908 |
| Missing | 7 | 1 | 7 | 18 | 3 | 12 |
| Mean value | -2,4581 | 7,3604 | 12,0317 | 2,9966 | 22,614 | 33,1077 |  |
| Median | -2,0000 | 7,3300 | 12,2000 | 2,4000 | 23,000 | 28,0000 |  |
| Standard deviation | 4,71026 | 1,36106 | 3,73942 | 2,35711 | 4,1281 | 20,21668 |  |
| Variance | 22,187 | 1,852 | 13,983 | 5,556 | 17,041 | 408,714 |  |
| Minimum | -27,80 | -1,70 | 3,50 | ,40 | -24,0 | -23,00 |  |
| Maximum | 33,96 | 41,00 | 89,00 | 25,33 | 35,0 | 200,00 |  |

| **Sex** |
| --- |
|  | Incidence | Percent | Valid percentages | Cumulative percentages |
| Valid | female | 258 | 28,0 | 28,0 | 28,0 |
| male | 662 | 72,0 | 72,0 | 100,0 |
| total | 920 | 100,0 | 100,0 |  |

| **Shock at admission** | |
| --- | --- |
|  | Incidence | | Percent | Valid percentages | Cumulative percentages |
| Valid | No | | 746 | 81,1 | 81,1 | 81,1 |
| Yes | | 174 | 18,9 | 18,9 | 100,0 |
| Total | | 920 | 100,0 | 100,0 |  |

| **Mortality** |
| --- |
|  | Incidence | Percent | Valid percentages | Cumulative percentages |
| Valid | No | 820 | 89,1 | 89,1 | 89,1 |
| Yes | 100 | 10,9 | 10,9 | 100,0 |
| Total | 920 | 100,0 | 100,0 |  |

Descriptive statistic – Anesthesiology (n=95)

| **Statistics** |
| --- |
|  | Age | ASA | AIS_head | AIS_face | AIS_thorax | AIS_abdomen | AIS_extremities | AIS_soft_tissue | ISS |
| N | Valid | 95 | 95 | 95 | 95 | 95 | 95 | 95 | 95 | 95 |
| Missing | 0 | 0 | 0 | 0 | 0 | 0 | 0 | 0 | 0 |
| Mean value | 45,83 | 1,58 | 2,54 | ,74 | 2,49 | 1,04 | 1,84 | ,75 | 28,93 |  |
| Median | 45,00 | 1,00 | 3,00 | ,00 | 3,00 | ,00 | 2,00 | 1,00 | 29,00 |  |
| Standard deviation | 22,024 | ,738 | 1,884 | 1,169 | 1,649 | 1,487 | 1,363 | ,850 | 9,615 |  |
| Variance | 485,035 | ,544 | 3,549 | 1,366 | 2,721 | 2,211 | 1,858 | ,723 | 92,452 |  |
| Minimum | 16 | 1 | 0 | 0 | 0 | 0 | 0 | 0 | 16 |  |
| Maximum | 88 | 3 | 6 | 5 | 5 | 5 | 5 | 3 | 75 |  |

| **Statistics** |
| --- |
|  | GCS_prehospitall | SBP (at admission) | HF (at admission) | Shock_index (at admission) | PRBC_48h | FFP_48h | TC_48h | PRBC_total | FFP_total | TC_total |
| N | Valid | 95 | 95 | 95 | 95 | 95 | 95 | 95 | 95 | 95 | 95 |
| Missing | 0 | 0 | 0 | 0 | 0 | 0 | 0 | 0 | 0 | 0 |
| Mean value | 9,82 | 126,59 | 86,78 | ,7274 | 4,17 | 3,26 | ,55 | 7,49 | 4,57 | ,67 |  |
| Median | 13,00 | 120,00 | 85,00 | ,6917 | ,00 | ,00 | ,00 | 3,00 | ,00 | ,00 |  |
| Standard deviation | 5,082 | 30,324 | 20,283 | ,26314 | 6,763 | 5,356 | 1,201 | 11,335 | 7,703 | 1,425 |  |
| Variance | 25,829 | 919,564 | 411,408 | ,069 | 45,737 | 28,685 | 1,442 | 128,487 | 59,333 | 2,031 |  |
| Minimum | 3 | 33 | 46 | ,25 | 0 | 0 | 0 | 0 | 0 | 0 |  |
| Maximum | 15 | 217 | 140 | 2,18 | 30 | 27 | 5 | 60 | 43 | 7 |  |

| **Statistics** |
| --- |
|  | Ventilation_hours | ICU_duration | Ward_duration | GOS |
| N | Valid | 95 | 95 | 95 | 95 |
| Missing | 0 | 0 | 0 | 0 |
| Mean value | 186,0000 | 12,0211 | 20,76 | 3,76 |  |
| Median | 36,0000 | 6,0000 | 16,00 | 4,00 |  |
| Standard deviation | 302,28629 | 14,24480 | 18,179 | 1,528 |  |
| Variance | 91377,000 | 202,914 | 330,483 | 2,334 |  |
| Minimum | ,00 | ,00 | 0 | 1 |  |
| Maximum | 1286,00 | 65,00 | 99 | 5 |  |

| **Statistics** |
| --- |
|  | BE (at admission) | pH (at admission) | Hb (at admission) | Lactat (at admission) | HCO3 (at admission) | PTT (at admission) |
| N | Valid | 93 | 93 | 94 | 91 | 93 | 94 |
| Missing | 2 | 2 | 1 | 4 | 2 | 1 |
| Mean value | -1,5753 | 7,3358 | 12,0223 | 2,4024 | 23,556 | 31,5372 |  |
| Median | -1,6000 | 7,3500 | 11,9000 | 2,1700 | 23,400 | 28,0000 |  |
| Standard deviation | 4,56429 | ,10209 | 1,91885 | 1,71476 | 4,1385 | 15,65739 |  |
| Variance | 20,833 | ,010 | 3,682 | 2,940 | 17,127 | 245,154 |  |
| Minimum | -20,80 | 6,80 | 7,20 | ,50 | 7,6 | 20,00 |  |
| Maximum | 21,00 | 7,62 | 15,90 | 14,40 | 45,5 | 160,00 |  |

| **Sex** |
| --- |
|  | Incidence | Percent | Valid percentages | Cumulative percentages |
| Valid | female | 28 | 29,5 | 29,5 | 29,5 |
| male | 67 | 70,5 | 70,5 | 100,0 |
| total | 95 | 100,0 | 100,0 |  |

| **Shock at admission** |
| --- |
|  | Incidence | Percent | Valid percentages | Cumulative percentages |
| Valid | No | 85 | 89,5 | 89,5 | 89,5 |
| Yes | 10 | 10,5 | 10,5 | 100,0 |
| Total | 95 | 100,0 | 100,0 |  |

| **Mortality** |
| --- |
|  | Incidence | Percent | Valid percentages | Cumulative percentages |
| Valid | No | 79 | 83,2 | 83,2 | 83,2 |
| Yes | 16 | 16,8 | 16,8 | 100,0 |
| Total | 95 | 100,0 | 100,0 |  |

Analytical statistic – between group comparisson (Trauma surgery vs. Anesthesiology) unmatched

**cross-classified table ICU*Sex**

| **Sex** |
| --- |

|  | | | Sex | | Total |
| --- | --- | --- | --- | --- | --- |
| female | male |
| ICU | Anesthesiology | Number | 28 | 67 | 95 |
|  |  | % in ICU | 29,5% | 70,5% | 100,0% |
|  | Trauma surgery | Number | 258 | 662 | 920 |
|  |  | % in ICU | 28,0% | 72,0% | 100,0% |
| Total |  | Number | 286 | 729 | 1015 |
|  |  | % in ICU | 28,2% | 71,8% | 100,0% |

**Chi-square-test**

| **Statistics** |
| --- |

|  | Value | df | Asymp. sig. (bilateral) | Exact sig. (bilateral) | Exact sig. (unilateral) |
| --- | --- | --- | --- | --- | --- |
| Pearson-Chi-square | ,087a | 1 | ,786 |  |  |
| continuity correctionb | ,031 | 1 | ,861 |  |  |
| Likelihood-quotient | ,086 | 1 | ´769 |  |  |
| exact test according to fischer |  |  |  | ,811 | ,425 |
| Connection  Linear-with-linear | ,087 | 1 | ,768 |  |  |
| Number of valid cases | 1015 |  |  |  |  |

1. 0 cells (0,0%) have the expected number of less than 5. The expected quorum is 26,77.
2. Calculation only for a 2x2-table

**cross-classified table ICU*Shock at admission**

| **Shock at admission** |
| --- |

|  | | | Shock at admission | | Total |
| --- | --- | --- | --- | --- | --- |
| no | yes |
| ICU | Anesthesiology | Number | 85 | 10 | 95 |
|  |  | % in ICU | 89,5% | 10,5% | 100,0% |
|  | Trauma surgery | Number | 746 | 174 | 920 |
|  |  | % in ICU | 81,1% | 18,9% | 100,0% |
| Total |  | Number | 831 | 184 | 1015 |
|  |  | % in ICU | 28,2% | 71,8% | 100,0% |

**Chi-square-test**

| **Statistics** |
| --- |

|  | Value | df | Asymp. sig. (bilateral) | Exact sig. (bilateral) | Exact sig. (unilateral) |
| --- | --- | --- | --- | --- | --- |
| Pearson-Chi-square | 4,081a | 1 | ,043 |  |  |
| continuity correctionb | 3,535 | 1 | ,060 |  |  |
| Likelihood-quotient | 4,600 | 1 | ,032 |  |  |
| exact test according to fischer |  |  |  | ,049 | ,025 |
| Connection  Linear-with-linear | 4,077 | 1 | ,043 |  |  |
| Number of valid cases | 1015 |  |  |  |  |

1. 0 cells (0,0%) have the expected number of less than 5. The expected quorum is 17,22.
2. Calculation only for a 2x2-table

**cross-classified table ICU*Mortality**

| **Mortality** |
| --- |

|  | | | Mortality | | Total |
| --- | --- | --- | --- | --- | --- |
| no | Yes |
| ICU | Anesthesiology | Number | 79 | 16 | 95 |
|  |  | % in ICU | 83,2% | 16,8% | 100,0% |
|  | Trauma surgery | Number | 820 | 100 | 920 |
|  |  | % in ICU | 81,1% | 10,9% | 100,0% |
| Total |  | Number | 899 | 116 | 1015 |
|  |  | % in ICU | 88,6% | 11,4% | 100,0% |

**Chi-square-test**

| **Statistics** |
| --- |

|  | Value | df | Asymp. sig. (bilateral) | Exact sig. (bilateral) | Exact sig. (unilateral) |
| --- | --- | --- | --- | --- | --- |
| Pearson-Chi-square | 3,034a | 1 | ,082 |  |  |
| continuity correctionb | 2,473 | 1 | ,116 |  |  |
| Likelihood-quotient | 2,732 | 1 | ,098 |  |  |
| exact test according to fischer |  |  |  | ,090 | ,063 |
| Connection  Linear-with-linear | 3,031 | 1 | ,082 |  |  |
| Number of valid cases | 1015 |  |  |  |  |

1. 0 cells (0,0%) have the expected number of less than 5. The expected quorum is 10,86.
2. Calculation only for a 2x2-table

**Aditional parameters (t-test in the case of unconnected samples)**

| **Group statistics** |
| --- |
|  | ICU | N | Mean value | Standard deviation | Standard error mean value |
| Age | Anesthesiology | 95 | 45,83 | 22,024 | 2,260 |
| Trauma surgery | 920 | 45,32 | 19,439 | ,641 |
| ASA | Anesthesiology | 95 | 1,58 | ,738 | ,076 |
| Trauma surgery | 920 | 1,42 | ,661 | ,022 |
| AIS_head | Anesthesiology | 95 | 2,54 | 1,884 | ,193 |
| Trauma surgery | 920 | 2,20 | 1,726 | ,057 |
| AIS_face | Anesthesiology | 95 | ,74 | 1,169 | ,120 |
| Trauma surgery | 920 | ,83 | 1,134 | ,037 |
| AIS_thorax | Anesthesiology | 95 | 2,49 | 1,649 | ,169 |
| Trauma surgery | 920 | 2,73 | 1,517 | ,050 |
| AIS_abdomen | Anesthesiology | 95 | 1,04 | 1,487 | ,153 |
| Trauma surgery | 920 | 1,17 | 1,433 | ,047 |
| AIS_extremities | Anesthesiology | 95 | 1,84 | 1,363 | ,140 |
| Trauma surgery | 920 | 2,25 | 1,345 | ,044 |
| AIS_soft_tissue | Anesthesiology | 95 | ,75 | ,850 | ,087 |
| Trauma surgery | 920 | ,65 | ,864 | ,028 |
| ISS | Anesthesiology | 95 | 28,93 | 9,615 | ,986 |
| Trauma surgery | 920 | 28,59 | 10,271 | ,339 |
| GCS_pre-hospital | Anesthesiology | 95 | 9,82 | 5,082 | ,521 |
| Trauma surgery | 920 | 10,32 | 5,001 | ,165 |
| SBP (at admission) | Anesthesiology | 95 | 126,59 | 30,324 | 3,111 |
| Trauma surgery | 919 | 118,67 | 29,513 | ,974 |
| HF (at admission) | Anesthesiology | 95 | 86,78 | 20,283 | 2,081 |
| Trauma surgery | 919 | 90,55 | 20,701 | ,683 |
| Shock_index (at admission) | Anesthesiology | 95 | ,7274 | ,26314 | ,02700 |
| Trauma surgery | 919 | ,8283 | ,39871 | ,01315 |
| BE (at admission) | Anesthesiology | 93 | -1,5753 | 4,56429 | ,47329 |
| Trauma surgery | 913 | -2,4581 | 4,71026 | ,15589 |
| pH (at admission) | Anesthesiology | 93 | 7,3358 | ,10209 | ,01059 |
| Trauma surgery | 919 | 7,3604 | 1,36106 | ,04490 |
| Hb (at admission) | Anesthesiology | 94 | 12,0223 | 1,91885 | ,19791 |
| Trauma surgery | 913 | 12,0317 | 3,73942 | ,12376 |
| Lactate (at admission) | Anesthesiology | 91 | 2,4024 | 1,71476 | ,17976 |
| Trauma surgery | 902 | 2,9966 | 2,35711 | ,07848 |
| HCO3 (at admission) | Anesthesiology | 93 | 23,556 | 4,1385 | ,4291 |
| Trauma surgery | 917 | 22,614 | 4,1281 | ,1363 |
| PTT (at admission) | Anesthesiology | 94 | 31,5372 | 15,65739 | 1,61494 |
| Trauma surgery | 908 | 33,1077 | 20,21668 | ,67091 |
| PRBC_48h | Anesthesiology | 95 | 4,17 | 6,763 | ,694 |
| Trauma surgery | 920 | 5,85 | 9,862 | ,325 |
| FFP_48h | Anesthesiology | 95 | 3,26 | 5,356 | ,550 |
| Trauma surgery | 920 | 4,31 | 7,919 | ,261 |
| TC_48h | Anesthesiology | 95 | ,55 | 1,201 | ,123 |
| Trauma surgery | 920 | ,78 | 1,983 | ,065 |
| PRBC_total | Anesthesiology | 95 | 7,49 | 11,335 | 1,163 |
| Trauma surgery | 920 | 10,40 | 16,341 | ,539 |
| FFP_total | Anesthesiology | 95 | 4,57 | 7,703 | ,790 |
| Trauma surgery | 920 | 6,08 | 11,705 | ,386 |
| TC_total | Anesthesiology | 95 | ,67 | 1,425 | ,146 |
| Trauma surgery | 920 | 1,17 | 3,347 | ,110 |
| GOS | Anesthesiology | 95 | 3,76 | 1,528 | ,157 |
| Trauma surgery | 920 | 3,86 | 1,370 | ,045 |

**Test in the case of unconnected samples**

| **Statistics** |
| --- |

|  | | Levene-test for equality of variance | | T-test for equality of means | | | | | | |
| --- | --- | --- | --- | --- | --- | --- | --- | --- | --- | --- |
| F | Sig. | t | df | Sig. (bilateral) | mean value difference | Standard error difference | 95% Confidence interval for the difference | |
| lower | higher |
| Age | equality of variance assumed | 4,680 | ,031 | ,241 | 1013 | ,810 | ,511 | 2,122 | -3,654 | 4,675 |
| equality of variance not assumed |  |  | ,218 | 109,661 | ,828 | ,511 | 2,349 | -4,144 | 5,166 |
| ASA | equality of variance assumed | 6,189 | ,013 | 2,227 | 1013 | ,026 | ,160 | ,072 | ,019 | ,302 |
| equality of variance not assumed |  |  | 2,037 | 110,169 | ,044 | ,160 | ,079 | ,004 | ,317 |
| AIS_head | equality of variance assumed | 2,683 | ,,102 | 1,801 | 1013 | ,072 | ,338 | ,188 | -0,30 | ,706 |
| equality of variance not assumed |  |  | 1,677 | 110,908 | 0,96 | ,338 | ,201 | -0,61 | ,737 |
| AIS_face | equality of variance assumed | ,348 | ,556 | -,790 | 1013 | ,430 | -,097 | ,123 | -,337 | ,144 |
| equality of variance not assumed |  |  | -,771 | 113,048 | ,442 | -,097 | ,126 | -,346 | ,152 |
| AIS_thorax | equality of variance assumed | 5,133 | ,024 | -1,443 | 1013 | ,149 | -,238 | ,165 | -,561 | ,086 |
| equality of variance not assumed |  |  | -1,348 | 111,045 | ,180 | -,238 | ,176 | -,588 | ,112 |
| AIS_abdomen | equality of variance assumed | ,010 | ,920 | -,830 | 1013 | ,407 | -,129 | ,155 | -,433 | ,175 |
| equality of variance not assumed |  |  | -,805 | 112,779 | ,423 | -,129 | ,160 | -,445 | ,188 |
| AIS_extremities | equality of variance assumed | ,457 | ,499 | -2,811 | 1013 | ,005 | -,408 | ,145 | -,693 | -,123 |
| equality of variance not assumed |  |  | -2,780 | 113,736 | ,006 | -,408 | ,147 | -,699 | -,117 |
| AIS_soft_tissue | equality of variance assumed | ,022 | ,881 | 1,000 | 1013 | ,317 | ,093 | ,093 | -0,89 | ,275 |
| equality of variance not assumed |  |  | 1,014 | 114,989 | ,313 | ,093 | ,092 | -0,89 | ,275 |
| ISS | equality of variance assumed | 1,958 | ,162 | ,301 | 1013 | ,763 | ,332 | 1,101 | -1,828 | 2,491 |
| equality of variance not assumed |  |  | ,318 | 117,291 | ,751 | ,332 | 1,043 | -1,734 | 2,397 |
| GCS_pre-hospital | equality of variance assumed | ,691 | ,406 | -,924 | 1013 | ,356 | -,499 | ,540 | -1,558 | ,561 |
| equality of variance not assumed |  |  | -,912 | 113,622 | ,364 | -,499 | ,547 | -1,582 | ,585 |
| SBP (at admission) | equality of variance assumed | ,025 | ,874 | 2,484 | 1012 | ,013 | 7,921 | 3,189 | 1,664 | 14,179 |
| equality of variance not assumed |  |  | 2,430 | 113,199 | ,017 | 7,921 | 3,260 | 1,463 | 14,380 |
| HF (at admission) | equality of variance assumed | ,057 | ,811 | -1,696 | 1012 | ,090 | -3,776 | 2,227 | -8,146 | ,594 |
| equality of variance not assumed |  |  | -1,724 | 115,196 | ,087 | -3,776 | 2,190 | -8,114 | ,562 |
| Shock_index (at admission) | equality of variance assumed | 4,806 | ,029 | -2,413 | 1012 | ,016 | -,10093 | ,04183 | -,18301 | -,01885 |
| equality of variance not assumed |  |  | -3,361 | 143,089 | ,001 | -,10093 | ,03003 | -,16029 | -,04157 |
| BE (at admission) | equality of variance assumed | ,780 | ,377 | 1,727 | 1004 | ,085 | ,88279 | ,51127 | -,12049 | 1,88607 |
| equality of variance not assumed |  |  | 1,772 | 112,909 | ,079 | ,88279 | ,49831 | -,10445 | 1,87003 |
| pH (at admission) | equality of variance assumed | ,493 | ,483 | -,174 | 1010 | ,862 | -,02461 | ,14124 | -,30177 | ,25254 |
| equality of variance not assumed |  |  | -,534 | 992,312 | ,594 | -,02461 | ,04613 | -,11513 | ,06591 |
| Hb (at admission) | equality of variance assumed | 2,803 | ,094 | -0,24 | 1005 | ,981 | -,00932 | ,39101 | -,77661 | ,75797 |
| equality of variance not assumed |  |  | -,040 | 177,184 | ,968 | -,00932 | ,23342 | -,46997 | ,45132 |
| Lactate (at admission) | equality of variance assumed | 7,917 | ,005 | -2,342 | 991 | ,019 | -,59414 | ,25365 | -1,09190 | -,09638 |
| equality of variance not assumed |  |  | -3,029 | 127,122 | ,003 | -,59414 | ,19614 | -,98227 | -,20601 |
| HCO3 (at admission) | equality of variance assumed | ,173 | ,678 | 2,097 | 1008 | ,036 | ,9424 | ,4494 | ,0606 | 1,8242 |
| equality of variance not assumed |  |  | 2,093 | 111,390 | ,039 | ,9424 | ,4503 | ,0502 | 1,8346 |
| PTT (at admission) | equality of variance assumed | 2,193 | ,139 | -,731 | 1000 | ,465 | -1,57043 | 2,14932 | -5,78812 | 2,64727 |
| equality of variance not assumed |  |  | -,898 | 127,483 | ,371 | -1,57043 | 1,74876 | -5,03077 | 1,88992 |
| PRBC_48h | equality of variance assumed | 3,112 | ,078 | -1,625 | 1013 | ,105 | -1,684 | 1,036 | -3,717 | ,350 |
| equality of variance not assumed |  |  | -2,197 | 139,130 | ,030 | -1,684 | ,766 | -3,199 | -,169 |
| FFP_48h | equality of variance assumed | 4,231 | ,040 | -1,253 | 1013 | ,210 | -1,042 | ,832 | -2,674 | ,590 |
| equality of variance not assumed |  |  | -1,713 | 140,493 | ,089 | -1,042 | ,608 | -2,245 | ,160 |
| TC_48h | equality of variance assumed | 4,209 | ,040 | -1,140 | 1013 | ,255 | -,236 | ,207 | -,643 | ,171 |
| equality of variance not assumed |  |  | -1,694 | 153,159 | ,092 | -,236 | ,139 | -,512 | ,039 |
| PRBC_total | equality of variance assumed | 2,702 | ,101 | -1,690 | 1013 | ,091 | -2,903 | 1,718 | -6,275 | ,468 |
| equality of variance not assumed |  |  | -2,265 | 138,025 | ,025 | -2,903 | 1,282 | -5,437 | -,369 |
| FFP_total | equality of variance assumed | 3,264 | ,071 | -1,232 | 1013 | ,218 | -1,513 | 1,228 | -3,922 | ,896 |
| equality of variance not assumed |  |  | -1,720 | 143,341 | ,088 | -1,513 | ,879 | -3,252 | ,225 |
| TC_total | equality of variance assumed | 5,487 | ,019 | -1,424 | 1013 | ,155 | -,494 | ,347 | -1,174 | ,187 |
| equality of variance not assumed |  |  | -2,695 | 224,116 | ,008 | -,494 | ,183 | -,855 | -,133 |
| GOS | equality of variance assumed | 4,242 | 0,40 | -7,12 | 1013 | ,477 | -,106 | ,149 | -,399 | ,187 |
| equality of variance not assumed |  |  | -,651 | 110,171 | ,516 | -,106 | ,163 | -,430 | ,217 |

| **Statistics** |
| --- |

| ICU | | N | Mean | standard deviation | standard error mean value |
| --- | --- | --- | --- | --- | --- |
| Ventilation_hours | Anesthesiology | 95 | 186,0000 | 302,28629 | 31,01392 |
| Trauma surgery | 920 | 230,3005 | 296,49902 | 9,77528 |
| ICU_stay | Anesthesiology | 95 | 12,0211 | 14,24480 | 1,46149 |
| Trauma surgery | 920 | 13,1145 | 13,09320 | ,43167 |
| Ward_stay | Anesthesiology | 95 | 20,76 | 18,179 | 1,865 |
| Trauma surgery | 920 | 22,53 | 18,044 | ,595 |

| **Statistics** |
| --- |

|  | | Levene-test for equality of variance | | T-test for equality of means | | | | | | |
| --- | --- | --- | --- | --- | --- | --- | --- | --- | --- | --- |
| F | Sig. | t | df | Sig. (bilateral) | mean value difference | Standard error difference | 95% Confidence interval for the difference | |
| lower | higher |
| Ventilation_hours | equality of variance assumed | ,417 | ,518 | -1,384 | 1013 | ,167 | -44,30051 | 32,01057 | -107,11512 | 18,51410 |
| equality of variance not assumed |  |  | -1,362 | 113,490 | ,176 | -44,30051 | 32,51798 | -108,72149 | 20,12047 |
| ICU_stay | equality of variance assumed | ,131 | ,718 | -,768 | 1013 | ,442 | -1,09349 | 1,42296 | -3,88578 | 1,69879 |
| equality of variance not assumed |  |  | -,718 | 111,030 | ,475 | -1,09349 | 1,52390 | -4,11320 | 1,92622 |
| Ward_stay | equality of variance assumed | ,179 | ,673 | -,913 | 1013 | ,362 | -1,776 | 1,946 | -5,594 | 2,043 |
| equality of variance not assumed |  |  | -,907 | 113,978 | ,366 | -1,776 | 1,958 | -5,654 | 2,102 |

Analytical statistic – Matched pair analysis (Comparisson trauma surgery versus anesthesiology)

Matching-parameters: Age, Sex, ASA, AIS, ISS

Total (n=52)

| **Statistics** |
| --- |
|  | Age | ASA before trauma | AIS_head | AIS_face | AIS_thorax | AIS_abdomen | AIS_extremities | AIS_soft_tissue | ISS |
| N | Valid | 52 | 52 | 52 | 52 | 52 | 52 | 52 | 52 | 52 |
| Missing | 0 | 0 | 0 | 0 | 0 | 0 | 0 | 0 | 0 |
| Mean value | 19,75 | 1,13 | 2,52 | ,90 | 2,87 | 1,40 | 2,48 | ,94 | 32,54 |  |
| Median | 20,00 | 1,00 | 3,00 | ,00 | 3,00 | ,00 | 3,00 | 1,00 | 34,00 |  |
| Standard deviation | 2,566 | ,345 | 1,686 | 1,317 | 1,456 | 1,648 | 1,229 | ,850 | 10,139 |  |
| Variance | 6,583 | ,119 | 2,843 | 1,736 | 2,119 | 2,716 | 1,509 | ,722 | 102,802 |  |
| Minimum | 16 | 1 | 0 | 0 | 0 | 0 | 0 | 0 | 17 |  |
| Maximum | 27 | 2 | 5 | 5 | 5 | 5 | 5 | 3 | 57 |  |

| **Statistics** |
| --- |
|  | GCS_prehospitall | SBP (at admission) | HF (at admission) | Shock_index (at admission) | PRBC_48h | FFP_48h | TC_48h | PRBC_total | FFP_total |
| N | Valid | 52 | 52 | 52 | 52 | 52 | 52 | 52 | 52 | 52 |
| Missing | 0 | 0 | 0 | 0 | 0 | 0 | 0 | 0 | 0 |
| Mean value | 8,50 | 122,25 | 96,25 | 6,69 | 5,50 | 1,06 | 10,83 | 7,94 | 1,25 |  |
| Median | 7,00 | 120,00 | 90,50 | 3,00 | 3,00 | ,00 | 6,00 | 4,00 | ,00 |  |
| Standard deviation | 5,245 | 26,280 | 21,139 | 9,399 | 8,038 | 2,191 | 14,053 | 11,634 | 2,440 |  |
| Variance | 27,510 | 690,623 | 446,858 | 88,335 | 64,608 | 4,801 | 197,479 | 135,350 | 5,956 |  |
| Minimum | 3 | 60 | 47 | 0 | 0 | 0 | 0 | 0 | 0 |  |
| Maximum | 15 | 180 | 137 | 34 | 35 | 10 | 60 | 49 | 10 |  |

| **Statistics** |
| --- |
|  | Duration_mechanical_ventilation (hours) | Duration_ICU_stay (days) | Duration_Inpatient_stay (days) | GOS |
| N | Valid | 52 | 52 | 52 | 52 |
| Missing | 0 | 0 | 0 | 0 |
| Mean value | 184,9038 | 13,1346 | 23,90 | 3,94 |  |
| Median | 72,0000 | 9,0000 | 18,50 | 5,00 |  |
| Standard deviation | 261,74814 | 15,90909 | 24,360 | 1,461 |  |
| Variance | 68512,089 | 253,099 | 593,422 | 2,134 |  |
| Minimum | ,00 | 1,00 | 0 | 1 |  |
| Maximum | 1198,00 | 101,00 | 140 | 5 |  |

| **Statistics** |
| --- |
|  | BE (at admission) | pH (at admission) | Hb (at admission) | Lactate (at admission) | HCO3 (at admission) | PTT (at admission) |
| N | Valid | 52 | 52 | 51 | 50 | 52 | 52 |
| Missing | 0 | 0 | 1 | 2 | 0 | 0 |
| Mean value | -2,5096 | 7,3117 | 11,7784 | 2,4012 | 23,131 | 38,0096 |  |
| Median | -2,0500 | 7,3200 | 11,9000 | 2,0800 | 24,000 | 30,0000 |  |
| Standard deviation | 4,29607 | ,09545 | 2,31018 | 1,44546 | 3,4793 | 23,41118 |  |
| Variance | 18,456 | ,009 | 5,337 | 2,089 | 12,106 | 548,083 |  |
| Minimum | -17,20 | 6,99 | 7,10 | ,50 | 10,0 | 21,00 |  |
| Maximum | 5,90 | 7,48 | 15,90 | 8,30 | 30,0 | 160,00 |  |

| **Sex** |
| --- |
|  | Incidence | percent | Valid percentages | Cumulative percentages |
| Valid | female | 11 | 21,2 | 21,2 | 21,2 |
| male | 41 | 78,8 | 78,8 | 100,0 |
| total | 52 | 100,0 | 100,0 |  |

| **Schock** |
| --- |
|  | Incidence | percent | Valid percentages | Cumulative percentages |
| Valid | No | 42 | 80,8 | 80,8 | 80,8 |
| Yes | 10 | 19,2 | 19,2 | 100,0 |
| Total | 52 | 100,0 | 100,0 |  |

| **Mortality** |
| --- |
|  | Incidence | percent | Valid percentages | Cumulative percentages |
| Valid | No | 45 | 86,5 | 86,5 | 86,5 |
| Yes | 7 | 13,5 | 13,5 | 100,0 |
| Total | 52 | 100,0 | 100,0 |  |

Between-group comparisson trauma surgery vs. anesthesiology (each n=26) - matched:

**cross-classified table matched ICU*Sex**

| **Sex** |
| --- |

|  | | | Sex | | Total |
| --- | --- | --- | --- | --- | --- |
| female | male |
| ICU | Anesthesiology | Number | 6 | 20 | 26 |
|  |  | % in ICU | 23,1% | 76,9% | 100,0% |
|  | Trauma surgery | Number | 5 | 21 | 26 |
|  |  | % in ICU | 19,2% | 80,8% | 100,0% |
| Total |  | Number | 11 | 41 | 52 |
|  |  | % in ICU | 21,2% | 78,8% | 100,0% |

**Chi-square-test**

| **Statistics** |
| --- |

|  | Value | df | Asymp. sig. (bilateral) | Exact sig. (bilateral) | Exact sig. (unilateral) |
| --- | --- | --- | --- | --- | --- |
| Pearson-Chi-square | ,115a | 1 | ,734 |  |  |
| continuity correctionb | ,000 | 1 | 1000 |  |  |
| Likelihood-quotient | ,115 | 1 | ,734 |  |  |
| exact test according to fischer |  |  |  | 1,000 | ,500 |
| Connection  Linear-with-linear | ,113 | 1 | ,737 |  |  |
| Number of valid cases | 52 |  |  |  |  |

1. 0 cells (0,0%) have the expected number of less than 5. The expected quorum is 5,50.
2. Calculation only for a 2x2-table

**cross-classified table matched ICU*Shock at admission**

| **Shock at admission** |
| --- |

|  | | | Shock at admission | | Total |
| --- | --- | --- | --- | --- | --- |
| no | yes |
| ICU | Anesthesiology | Number | 22 | 4 | 26 |
|  |  | % in ICU | 84,6% | 15,4% | 100,0% |
|  | Trauma surgery | Number | 20 | 6 | 26 |
|  |  | % in ICU | 76,9% | 23,1% | 100,0% |
| Total |  | Number | 42 | 10 | 52 |
|  |  | % in ICU | 80,8% | 19,2% | 100,0% |

**Chi-square-test**

| **Statistics** |
| --- |

|  | Value | df | Asymp. sig. (bilateral) | Exact sig. (bilateral) | Exact sig. (unilateral) |
| --- | --- | --- | --- | --- | --- |
| Pearson-Chi-square | ,495 a | 1 | ,482 |  |  |
| continuity correctionb | ,124 | 1 | ,725 |  |  |
| Likelihood-quotient | ,498 | 1 | ,480 |  |  |
| exact test according to fischer |  |  |  | ,726 | ,363 |
| Connection  Linear-with-linear | ,486 | 1 | ,486 |  |  |
| Number of valid cases | 52 |  |  |  |  |

1. 0 cells (0,0%) have the expected number of less than 5. The expected quorum is 5,00.
2. Calculation only for a 2x2-table

**cross-classified table matched ICU*Mortality**

| **Mortality** |
| --- |

|  | | | Mortality | | Total |
| --- | --- | --- | --- | --- | --- |
| no | yes |
| ICU | Anesthesiology | Number | 21 | 5 | 26 |
|  |  | % in ICU | 80,8% | 19,2% | 100,0% |
|  | Trauma surgery | Number | 24 | 2 | 26 |
|  |  | % in ICU | 92,3% | 7,7% | 100,0% |
| Total |  | Number | 45 | 7 | 52 |
|  |  | % in ICU | 86,5% | 13,5% | 100,0% |

**Chi-square-test**

| **Statistics** |
| --- |

|  | Value | df | Asymp. sig. (bilateral) | Exact sig. (bilateral) | Exact sig. (unilateral) |
| --- | --- | --- | --- | --- | --- |
| Pearson-Chi-square | 1,486a | 1 | ,223 |  |  |
| continuity correctionb | ,660 | 1 | ,416 |  |  |
| Likelihood-quotient | 1,528 | 1 | ,216 |  |  |
| exact test according to fischer |  |  |  | ,419 | ,209 |
| Connection  Linear-with-linear | 1,457 | 1 | ,227 |  |  |
| Number of valid cases | 52 |  |  |  |  |

1. 0 cells (0,0%) have the expected number of less than 5. The expected quorum is 3,50.
2. Calculation only for a 2x2-table

**Aditional parameters (t-test in the case of unconnected samples)**

| **Group statstics** |
| --- |
|  | ICU | N | Mean value | Standard deviation | Standard error mean value |
| Age | Anesthesiology | 26 | 20,23 | 3,204 | ,628 |
| Trauma surgery | 26 | 19,27 | 1,638 | ,321 |
| ASA | Anesthesiology | 26 | 1,15 | ,368 | ,072 |
| Trauma surgery | 26 | 1,12 | ,326 | ,064 |
| AIS_head | Anesthesiology | 26 | 2,54 | 1,794 | ,352 |
| Trauma surgery | 26 | 2,50 | 1,606 | ,315 |
| AIS_face | Anesthesiology | 26 | 1,19 | 1,575 | ,309 |
| Trauma surgery | 26 | ,62 | ,941 | ,185 |
| AIS_thorax | Anesthesiology | 26 | 2,85 | 1,567 | ,307 |
| Trauma surgery | 26 | 2,88 | 1,366 | ,268 |
| AIS_abdomen | Anesthesiology | 26 | 1,15 | 1,515 | ,297 |
| Trauma surgery | 26 | 1,65 | 1,765 | ,346 |
| AIS_extremities | Anesthesiology | 26 | 2,38 | 1,329 | ,261 |
| Trauma surgery | 26 | 2,58 | 1,137 | ,223 |
| AIS_soft_tissue | Anesthesiology | 26 | ,92 | ,935 | ,183 |
| Trauma surgery | 26 | ,96 | ,774 | ,152 |
| ISS | Anesthesiology | 26 | 33,15 | 8,925 | 1,750 |
| Trauma surgery | 26 | 31,92 | 11,370 | 2,230 |
| GCS_pre-hospital | Anesthesiology | 26 | 7,50 | 5,194 | 1,019 |
| Trauma surgery | 26 | 9,50 | 5,202 | 1,020 |
| SBP (at admission) | Anesthesiology | 26 | 125,92 | 21,219 | 4,161 |
| Trauma surgery | 26 | 118,58 | 30,505 | 5,983 |
| HF (at admission) | Anesthesiology | 26 | 94,00 | 19,657 | 3,855 |
| Trauma surgery | 26 | 98,50 | 22,686 | 4,449 |
| Shock_index (at admission) | Anesthesiology | 26 | ,7653 | ,20201 | ,03962 |
| Trauma surgery | 26 | ,8999 | ,39821 | ,07809 |
| BE (at admission) | Anesthesiology | 26 | -2,8269 | 3,96409 | ,77742 |
| Trauma surgery | 26 | -2,1923 | 4,66124 | ,91414 |
| pH (at admission) | Anesthesiology | 26 | 7,3047 | ,08126 | ,01594 |
| Trauma surgery | 26 | 7,3186 | ,10901 | ,02138 |
| Hb (at admission) | Anesthesiology | 26 | 11,7692 | 1,76131 | ,34542 |
| Trauma surgery | 25 | 11,7880 | 2,80837 | ,56167 |
| Lactate (at admission) | Anesthesiology | 25 | 2,2600 | 1,22756 | ,24551 |
| Trauma surgery | 25 | 2,5424 | 1,64844 | ,32969 |
| HCO3 (at admission) | Anesthesiology | 26 | 22,885 | 3,4828 | ,6830 |
| Trauma surgery | 26 | 23,377 | 3,5270 | ,6917 |
| PTT (at admission) | Anesthesiology | 26 | 37,9038 | 26,05610 | 5,11002 |
| Trauma surgery | 26 | 38,1154 | 20,95581 | 4,10977 |
| PRBC_48h | Anesthesiology | 26 | 5,85 | 8,592 | 1,685 |
| Trauma surgery | 26 | 7,54 | 10,242 | 2,009 |
| FFP_48h | Anesthesiology | 26 | 4,85 | 6,643 | 1,303 |
| Trauma surgery | 26 | 6,15 | 9,315 | 1,827 |
| TC_48h | Anesthesiology | 26 | ,69 | 1,436 | ,282 |
| Trauma surgery | 26 | 1,42 | 2,730 | ,535 |
| PRBC_total | Anesthesiology | 26 | 9,31 | 13,332 | 2,615 |
| Trauma surgery | 26 | 12,35 | 14,843 | 2,911 |
| FFP_total | Anesthesiology | 26 | 6,23 | 9,236 | 1,811 |
| Trauma surgery | 26 | 9,65 | 13,591 | 2,665 |
| TC_total | Anesthesiology | 26 | ,85 | 1,461 | ,287 |
| Trauma surgery | 26 | 1,65 | 3,111 | ,610 |
| GOS | Anesthesiology | 26 | 3,58 | 1,677 | ,329 |
| Trauma surgery | 26 | 4,31 | 1,123 | ,220 |

**Test in the case of unconnected samples**

| **Statistics** |
| --- |

|  | | Levene-test for equality of variance | | T-test for equality of means | | | | | | |
| --- | --- | --- | --- | --- | --- | --- | --- | --- | --- | --- |
| F | Sig. | t | df | Sig. (bilateral) | mean value difference | Standard error difference | 95% Confidence interval for the difference | |
| lower | higher |
| Age | equality of variance assumed | 8,585 | ,005 | 1,362 | 50 | ,179 | ,962 | ,706 | -,456 | 2,379 |
| equality of variance not assumed |  |  | 1,362 | 37,240 | ,181 | ,962 | ,706 | -,468 | 2,391 |
| ASA bevor accident | equality of variance assumed | ,643 | ,426 | ,399 | 50 | ,692 | ,038 | ,096 | -,155 | ,232 |
| equality of variance not assumed |  |  | ,399 | 49,278 | ,692 | ,038 | ,096 | -,155 | ,232 |
| AIS_head | equality of variance assumed | ,530 | ,470 | ,081 | 50 | ,935 | ,038 | ,472 | -,910 | ,987 |
| equality of variance not assumed |  |  | ,081 | 49,401 | ,935 | ,038 | ,472 | -,910 | ,987 |
| AIS_face | equality of variance assumed | 8,237 | ,006 | 1,603 | 50 | ,115 | ,577 | ,360 | -,146 | 1,300 |
| equality of variance not assumed |  |  | 1,603 | 40,836 | ,117 | ,577 | ,360 | -,150 | 1,304 |
| AIS_thorax | equality of variance assumed | ,111 | ,740 | -,094 | 50 | ,925 | -,038 | ,408 | -,857 | ,780 |
| equality of variance not assumed |  |  | -,094 | 49,087 | ,925 | -,038 | ,408 | -,858 | ,781 |
| AIS_abdomen | equality of variance assumed | ,788 | ,379 | -1,096 | 50 | ,278 | -,500 | ,456 | -1,416 | ,416 |
| equality of variance not assumed |  |  | -1,096 | 48,877 | ,278 | -,500 | ,456 | -1,417 | ,417 |
| AIS_extremities | equality of variance assumed | ,291 | ,592 | -,561 | 50 | ,578 | -,192 | ,343 | -,881 | ,497 |
| equality of variance not assumed |  |  | -,561 | 48,837 | ,578 | -,192 | ,343 | -,882 | ,497 |
| AIS_soft_tissue | equality of variance assumed | 1,968 | ,167 | -,162 | 50 | ,872 | -,038 | ,238 | -,516 | ,440 |
| equality of variance not assumed |  |  | -,162 | 48,310 | ,872 | -,038 | ,238 | -,517 | ,440 |
| ISS | equality of variance assumed | 2,575 | ,115 | ,434 | 50 | ,666 | 1,231 | 2,835 | -4,463 | 6,925 |
| equality of variance not assumed |  |  | ,434 | 47,331 | ,666 | 1,231 | 2,835 | -4,471 | 6,932 |
| GCS_pre-hospital | equality of variance assumed | ,005 | ,942 | -1,387 | 50 | ,172 | -2,000 | 1,442 | -4,896 | ,896 |
| equality of variance not assumed |  |  | -1,387 | 50,000 | ,172 | -2,000 | 1,442 | -4,896 | ,896 |
| SBP (at admission) | equality of variance assumed | 1,946 | ,169 | 1,008 | 50 | ,318 | 7,346 | 7,288 | -7,291 | 21,984 |
| equality of variance not assumed |  |  | 1,008 | 44,603 | ,319 | 7,346 | 7,288 | -7,335 | 22,028 |
| HF (at admission) | equality of variance assumed | 1,446 | ,235 | -,764 | 50 | ,448 | -4,500 | 5,887 | -16,324 | 7,324 |
| equality of variance not assumed |  |  | -,764 | 49,007 | ,448 | -4,500 | 5,887 | -16,330 | 7,330 |
| Shock_index (at admission) | equality of variance assumed | 2,646 | ,110 | -1,537 | 50 | ,131 | -,13457 | ,08757 | -,31046 | ,04131 |
| equality of variance not assumed |  |  | -1,537 | 37,068 | ,133 | -,13457 | ,08757 | -,31199 | ,04285 |
| BE (at admission) | equality of variance assumed | ,856 | ,359 | -,529 | 50 | ,599 | -,63462 | 1,20002 | -3,04492 | 1,77569 |
| equality of variance not assumed |  |  | -,529 | 48,743 | ,599 | -,63462 | 1,20002 | -3,04647 | 1,77723 |
| pH (at admission) | equality of variance assumed | 1,127 | ,293 | -,522 | 50 |  | -,01392 | ,02666 | -,06748 | ,03963 |
| equality of variance not assumed |  |  |  | 46,229 |  |  |  | -,06759 | ,03974 |
| Hb (at admission) | equality of variance assumed | 8,401 | ,006 | -,029 | 49 | ,977 | -,01877 | ,65367 | -1,33236 | 1,29483 |
| equality of variance not assumed |  |  | -,028 | 40,083 | ,977 | -,01877 | ,65939 | -1,35136 | 1,31382 |
| Lactate (at admission) | equality of variance assumed | ,545 | ,464 | -,687 | 48 | ,495 | -,28240 | ,41106 | -1,10889 | 1,4602 |
| equality of variance not assumed |  |  | -,687 | 44,358 | ,496 | -,28240 | ,41106 | -1,11065 | 1,4602 |
| HCO3 (at admission) | equality of variance assumed | ,591 | ,446 | -,506 | 50 | ,615 | -,4923 | ,9721 | -2,4448 | 1,4602 |
| equality of variance not assumed |  |  | -,506 | 49,992 | ,615 | -,4923 | ,9721 | -2,4448 | 1,4602 |
| PTT (at admission) | equality of variance assumed | ,126 | ,724 | -0,32 | 50 | ,974 | -,21154 | 6,55763 | -13,38293 | 12,95986 |
| equality of variance not assumed |  |  | -0,32 | 47,802 | ,974 | -,21154 | 6,55763 | -13,39796 | 12,97488 |
| PRBC_48h | equality of variance assumed | 1,032 | ,315 | -,645 | 50 | ,522 | -1,692 | 2,622 | -6,958 | 3,574 |
| equality of variance not assumed |  |  | -,645 | 48,532 | ,522 | -1,692 | 2,622 | -6,962 | 3,578 |
| FFP_48h | equality of variance assumed | 1,228 | ,273 | -,583 | 50 | ,563 | -1,308 | 2,244 | -5,815 | 3,199 |
| equality of variance not assumed |  |  | -,583 | 45,204 | ,563 | -1,308 | 2,244 | -5,827 | 3,211 |
| TC_48h | equality of variance assumed | 5,970 | ,018 | -1,208 | 50 | ,233 | -,731 | ,605 | -1,946 | ,484 |
| equality of variance not assumed |  |  | -1,208 | 37,846 | ,235 | -,731 | ,605 | -1,956 | ,494 |
| PRBC_total | equality of variance assumed | 1,692 | ,199 | -,777 | 50 | ,441 | -3,038 | 3,913 | -10,898 | 4,821 |
| equality of variance not assumed |  |  | -,777 | 49,435 | ,441 | -3,038 | 3,913 | -10,900 | 4,823 |
| FFP_total | equality of variance assumed | 3,785 | ,057 | -1,062 | 50 | ,293 | -3,423 | 3,223 | -9,896 | 3,050 |
| equality of variance not assumed |  |  | -1,062 | 44,032 | ,294 | -3,423 | 3,223 | -9,918 | 3,072 |
| TC_total | equality of variance assumed | 8,174 | ,006 | -1,062 | 50 | ,293 | -3,423 | 3,223 | -9,896 | 3,050 |
| equality of variance not assumed |  |  | -1,062 | 44,032 | ,294 | -3,423 | 3,223 | -9,918 | 3,072 |
| GOS | equality of variance assumed | 13,459 | ,0010 | -1,846 | 50 | ,071 | -,731 | ,396 | -1,526 | ,064 |
| equality of variance not assumed |  |  | -1,846 | 43,665 | ,072 | -,731 | ,396 | -1,529 | ,067 |

| **Statistics** |
| --- |

| ICU | | N | Mean | standard deviation | standard error mean value |
| --- | --- | --- | --- | --- | --- |
| Ventilation_hours | Anesthesiology | 26 | 153,5000 | 262,23947 | 51,42939 |
| Trauma surgery | 26 | 216,3077 | 262,57156 | 51,49452 |
| ICU_stay (days) | Anesthesiology | 26 | 10,9615 | 11,73535 | 2,30149 |
| Trauma surgery | 26 | 15,3077 | 19,20369 | 3,76615 |
| Ward_stay (days) | Anesthesiology | 26 | 20,27 | 16,636 | 3,263 |
| Trauma surgery | 26 | 27,54 | 30,105 | 5,904 |

| **Statistics** |
| --- |

|  | | Levene-test for equality of variance | | T-test for equality of means | | | | | | |
| --- | --- | --- | --- | --- | --- | --- | --- | --- | --- | --- |
| F | Sig. | t | df | Sig. (bilateral) | mean value difference | Standard error difference | 95% Confidence interval for the difference | |
| lower | higher |
| Ventilation_hours | equality of variance assumed | ,002 | ,969 | -,863 | 50 | ,392 | -62,80769 | 72,77821 | -208,98703 | 83,37164 |
| equality of variance not assumed |  |  | -,863 | 50,000 | ,392 | -62,80769 | 72,77821 | -208,98703 | 83,37165 |
| ICU_stay | equality of variance assumed | ,172 | ,680 | -,985 | 50 | ,330 | -4.34615 | 4,41370 | -13,21134 | 4,51903 |
| equality of variance not assumed |  |  | -,985 | 41,387 | ,330 | -4.34615 | 4,41370 | -13,25728 | 4,57497 |
| Ward_stay | equality of variance assumed | 1,551 | ,219 | -1,078 | 50 | ,286 | -7,269 | 6,746 | -20,818 | 6,280 |
| equality of variance not assumed |  |  | -1,078 | 38,966 | ,288 | -7,269 | 6,746 | -20,914 | 6,376 |
